# Supplementary material for: Halide-free highly-pure imidazolium triflate ionic liquids: Preparation and use in palladium-catalysed allylic alkylation
Source: Royal Society of Chemistry journal article supplement (doi:10.1039/b703096g), 2007-01-01
Supplement: b703096g.doc [file b703096g.doc]

Supplementary Material (ESI) for Green Chemistry

This journal is © The Royal Society of Chemistry 2007

**Halide-free Highly-pure Imidazolium Triflate Ionic Liquids: Preparation and Use in Palladium-Catalysed Allylic Alkylation**

**Loïc Leclercq,*a* Isabelle Suisse,*a* Guy Nowogrocki*a* and Francine Agbossou-Niedercorn**a***

a Unité Catalyse et Chimie du Solide UMR CNRS 8181, ENSCL (CHIMIE), BT C7, BP 90108, 59652 Villeneuve d’Ascq Cedex, France. Fax: 33 3 20 43 65 85; Tel 33 3 20 43 49 27; E-mail: francine.agbossou@ensc-lille.fr

The cation coordination environment in **16** obtained by X-ray diffraction structure analysis.

A view of the molecular arrangement in **16** obtained by X-Ray crystal structure analysis.
